# Supplementary material for: Repulsive guidance molecule B inhibits metastasis and is associated with decreased mortality in non-small cell lung cancer
Source: PubMed Central journal article supplement (PMC4941269; doi:10.18632/oncotarget.7463), 2016-02-17
Supplement: oncotarget-07-15678-s001.pdf [file oncotarget-07-15678-s001.pdf]

## Repulsive guidance molecule B inhibits metastasis and is associated with decreased mortality in non-small cell lung cancer

### Supplementary Materials

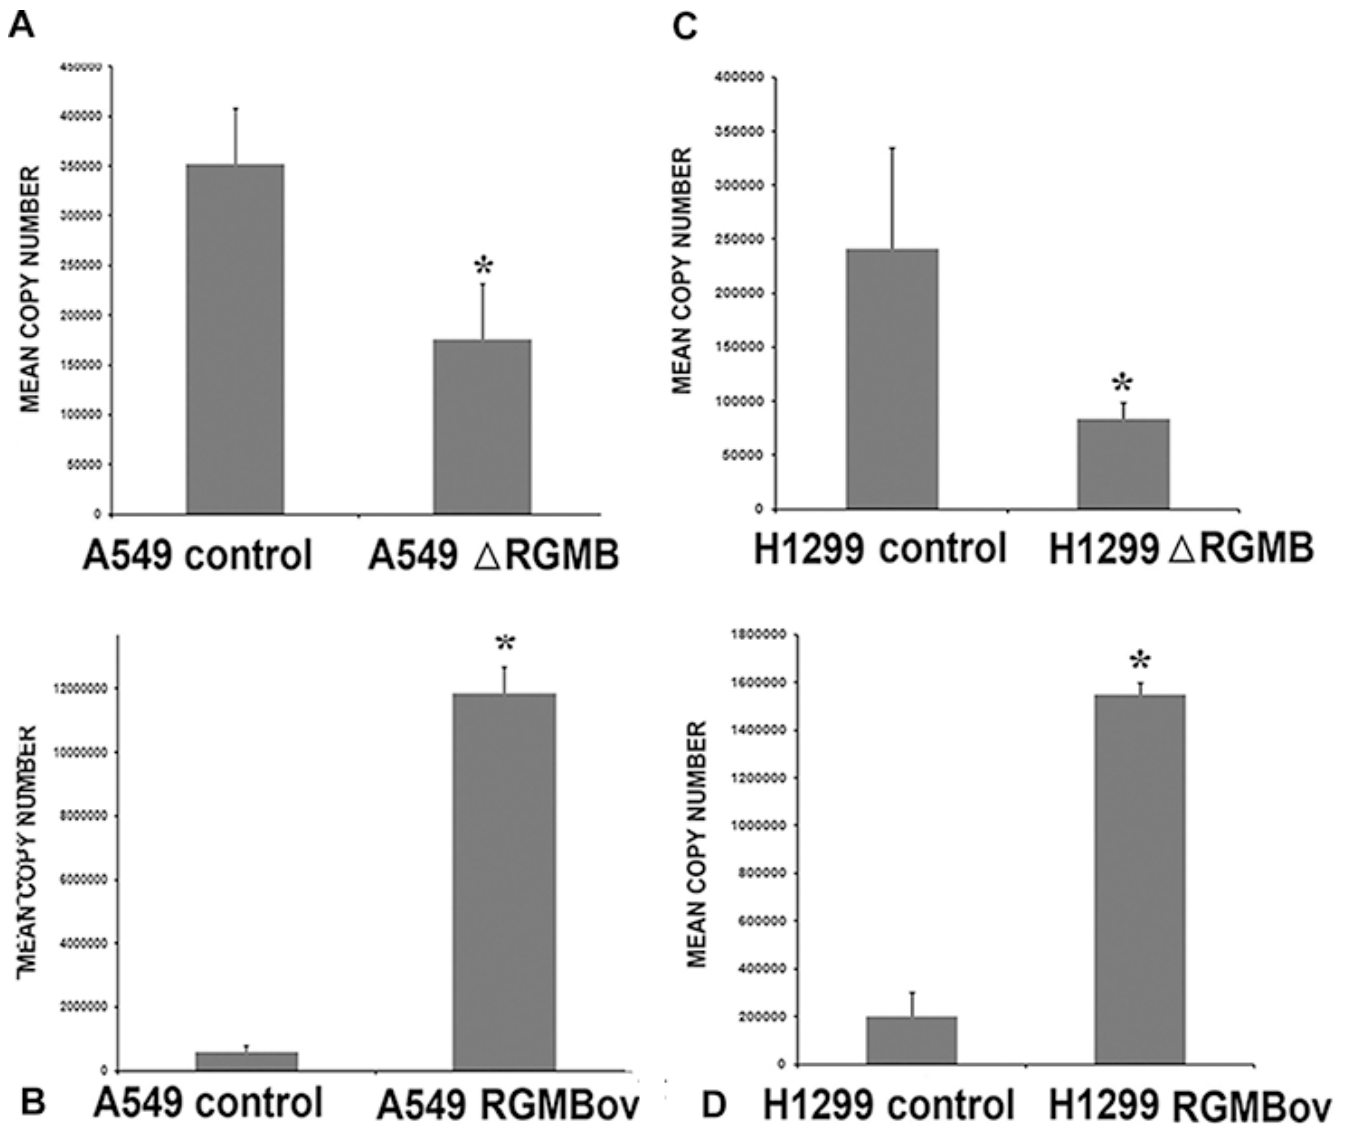

Supplementary Figure S1: Knockdown and overexpression of RGMB in A549 and H1299 cells.

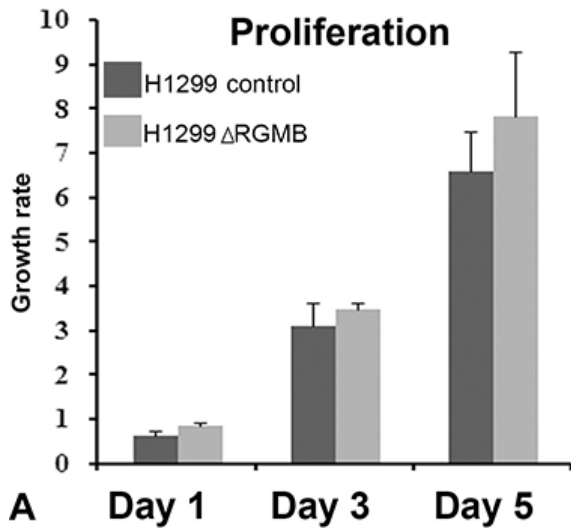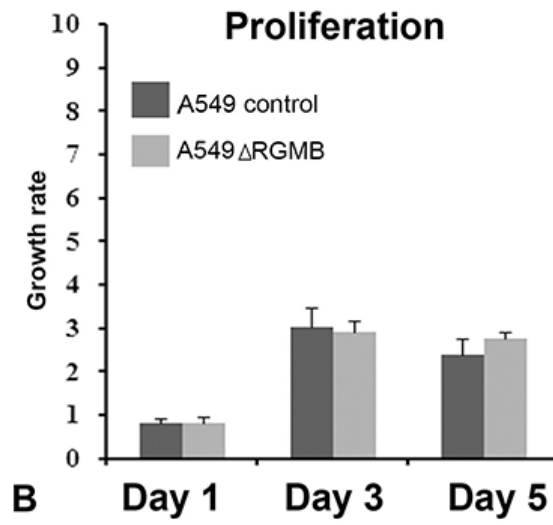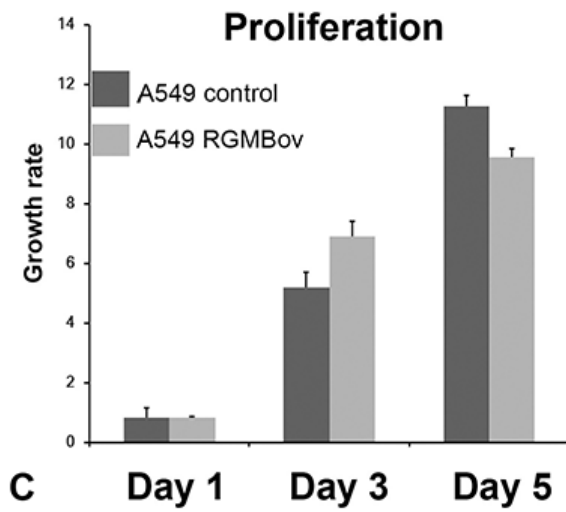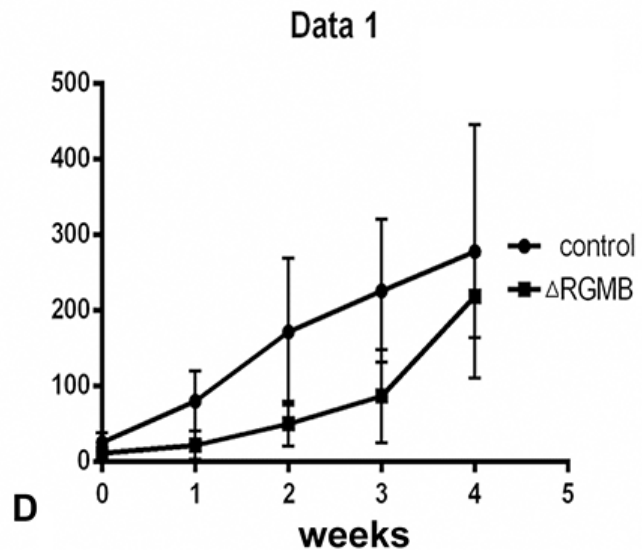

Supplementary Figure S2: Proliferation of A549 and H1299 RGMB knockdown and overexpression cells *in vitro* and *in vivo*.

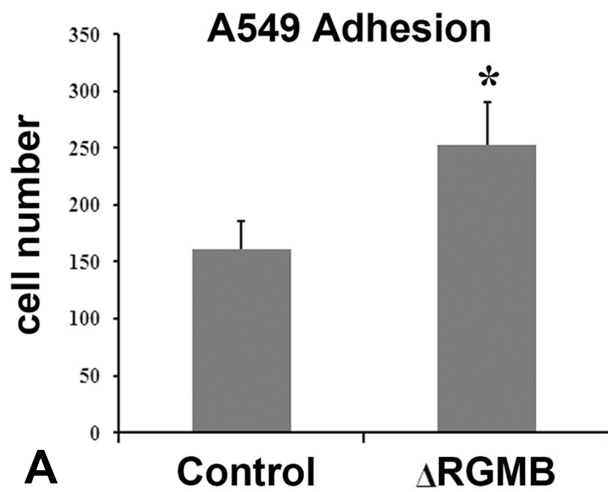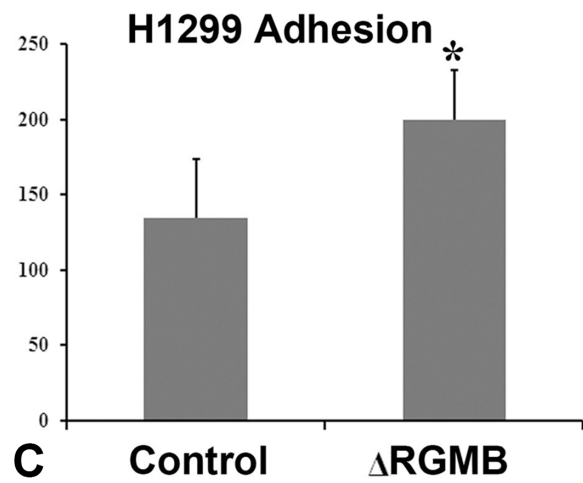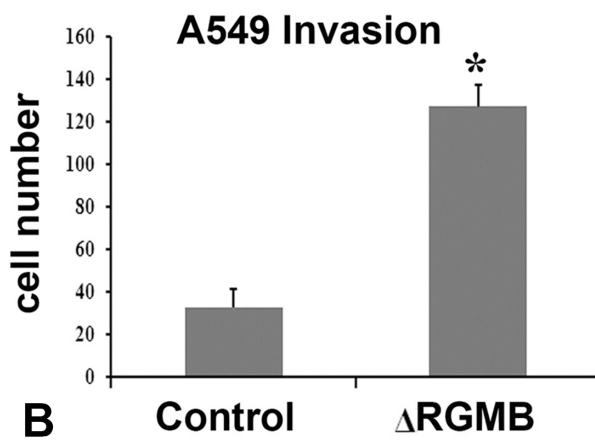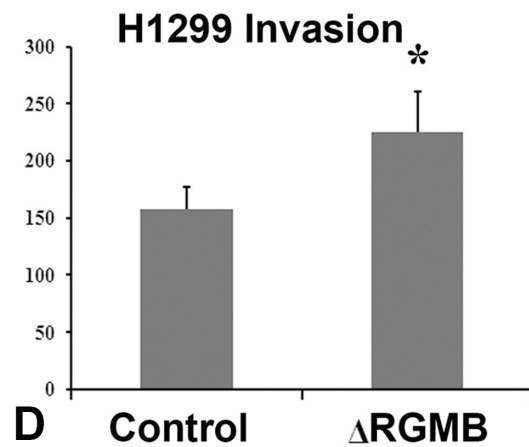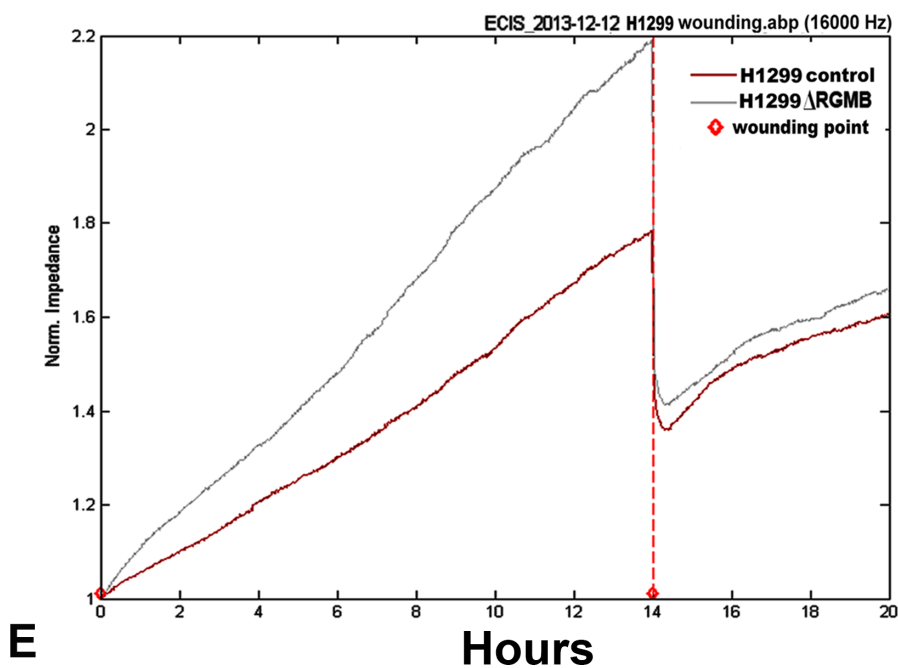

Supplementary Figure S3: Evaluation of RGMB knockdown A549 and H1299 cell adhesion, invasion, and ECIS-based migration.

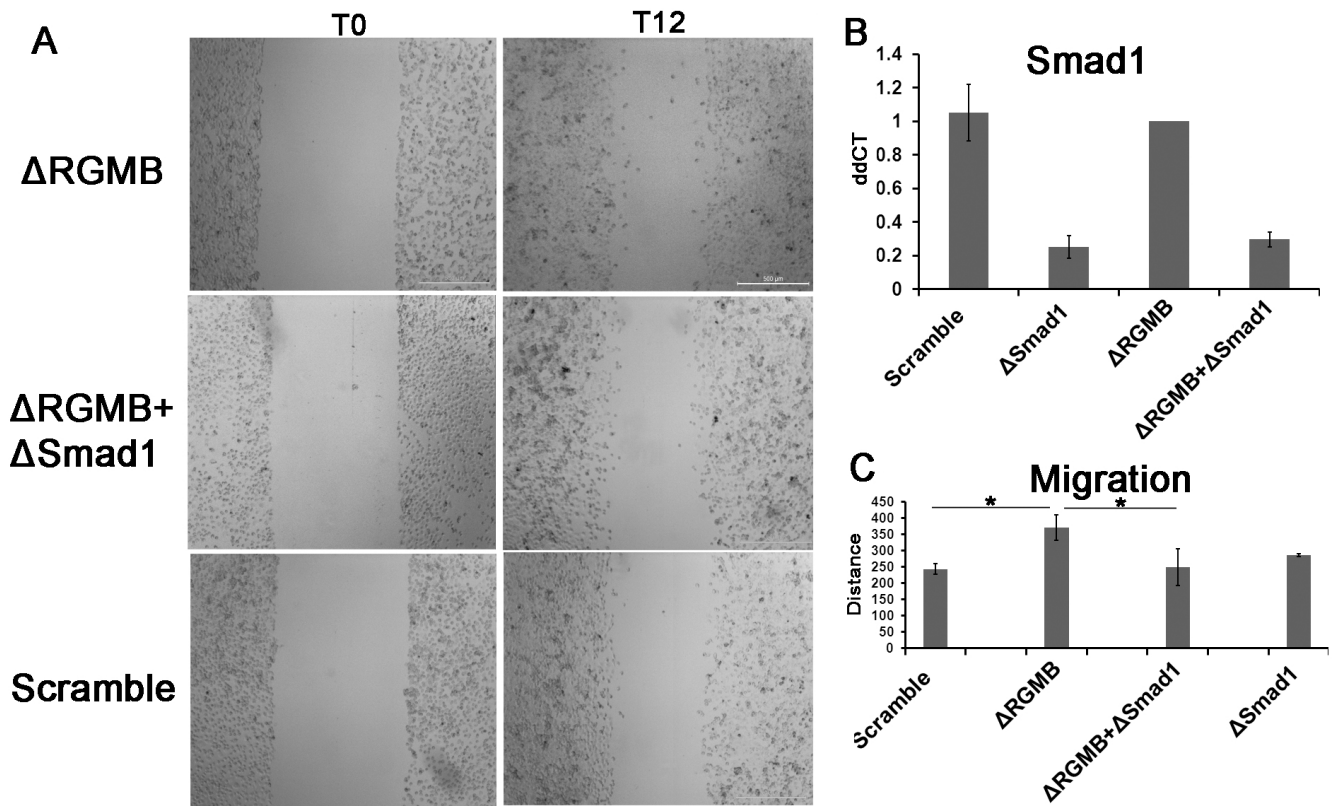

Supplementary Figure S4: Knockdown of *smad1* diminishes the impact of RGMB suppression on migration after 12 hours.

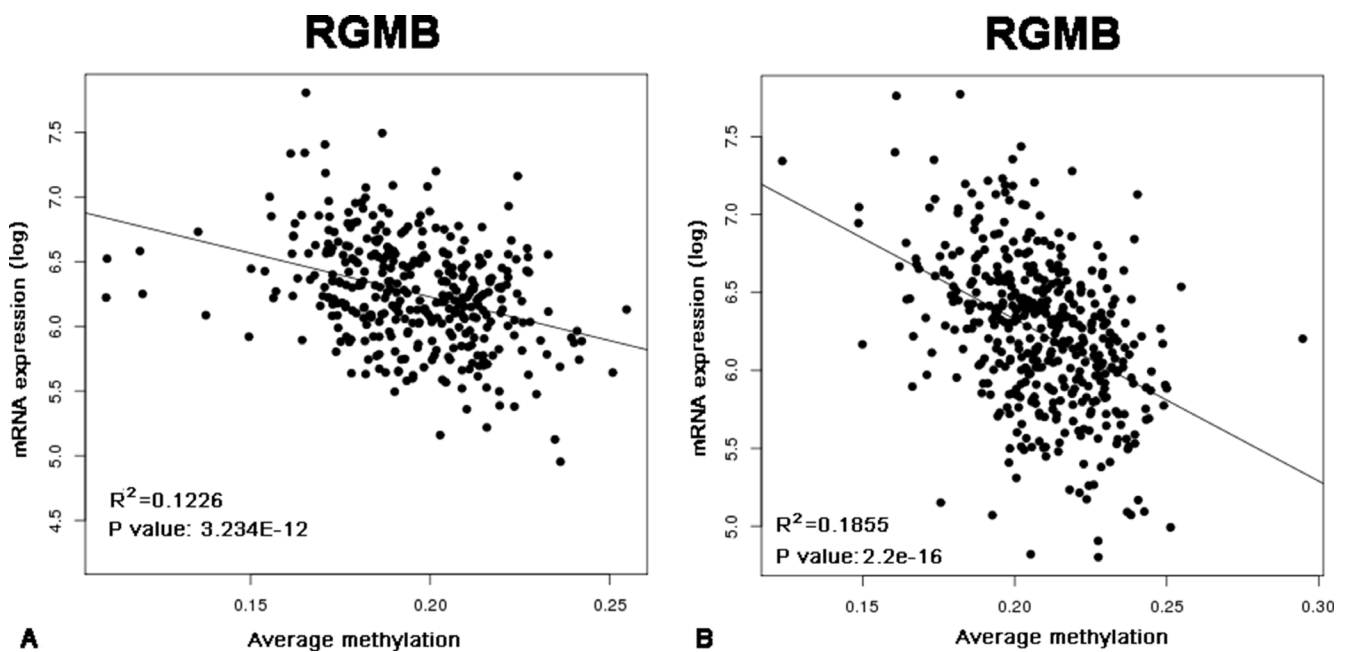

Supplementary Figure S5: The association between methylation and *RGMB* expression in LUSC (left) and LUAD (right).

**Supplementary Table S1: Patient demographics and clinical characteristics**

| Characteristics        |                      | Discovery set |      | Validation set |      |
|------------------------|----------------------|---------------|------|----------------|------|
|                        |                      | NO.           | %    | NO.            | %    |
| Tissue type            | Tumor                | 165           | 88.2 | 131            | 100  |
|                        | Normal               | 22            | 11.8 | 0              | 0    |
| Age (years)            | ≤ 65                 | 113           | 60.4 | 96             | 73.3 |
|                        | > 65                 | 49            | 26.2 | 35             | 26.7 |
| Gende                  | Female               | 64            | 34.2 | 58             | 44.3 |
|                        | Male                 | 101           | 54.0 | 73             | 55.7 |
| Smoking status         | Yes                  | 58            | 31.0 | 31             | 23.7 |
|                        | No                   | 102           | 54.5 | 98             | 74.8 |
| Histology              | ADC <sup>+</sup>     | 139           | 74.3 | 131            | 100  |
|                        | SCC <sup>+</sup>     | 17            | 9.1  | 0              | 0    |
|                        | Other                | 9             | 4.8  | 0              | 0    |
| Stage                  | I                    | 53            | 28.3 | 61             | 46.6 |
|                        | II                   | 46            | 24.6 | 26             | 19.8 |
|                        | IIIA                 | 33            | 17.6 | 40             | 30.5 |
|                        | IIIB                 | 9             | 4.9  | 0              | 0    |
|                        | IV                   | 24            | 12.8 | 2              | 1.5  |
| Differentiation        | well                 | 0             | 0    | 0              | 0    |
|                        | moderate             | 117           | 62.6 | 99             | 75.6 |
|                        | poor                 | 38            | 20.3 | 32             | 24.4 |
| Tumor nodularity       | Unilateral pulmonary | 158           | 84.5 | 126            | 96.2 |
|                        | Bilateral pulmonary  | 7             | 3.7  | 5              | 3.8  |
| Pleura involvement     | Yes                  | 88            | 47.1 | 94             | 71.8 |
|                        | No                   | 77            | 41.2 | 37             | 28.2 |
| Lymph node involvement | Yes                  | 92            | 49.2 | 52             | 39.7 |
|                        | No                   | 73            | 39.0 | 79             | 60.3 |
| Vascular invasion      | Yes                  | 6             | 3.2  | 4              | 3.1  |
|                        | No                   | 159           | 85.0 | 127            | 96.9 |
| Clinical outcome       | Alive                | 109           | 58.3 | 109            | 83.2 |
|                        | Death                | 54            | 28.9 | 20             | 15.3 |

+ADC: adenocarcinoma; SCC: squamous cell carcinoma.
